# Supplementary material for: Copolymerization of ethylene with norbornene catalyzed by cationic rare earth metal fluorenyl functionalized N-heterocyclic carbene complexes
Source: Royal Society of Chemistry journal article supplement (doi:10.1039/b910306f), 2009-01-01
Supplement: b910306f.pdf [file b910306f.pdf]

## Copolymerization of ethylene with norbornene catalyzed by cationic rare-earth metal fluorenyl functionalized N-heterocyclic carbene complexes

Baoli Wang,<sup>a, b</sup> Tao Tang,<sup>a</sup> Yuesheng Li,<sup>a</sup> Dongmei Cui<sup>a\*</sup>

<sup>a</sup> State Key Laboratory of Polymer Physics and Chemistry, Changchun Institute of Applied Chemistry, Chinese Academy of Sciences, 5625 Renmin Street, Changchun 130022 (China). Fax: (+86) 431- 8526-2773, E-mail: dmcui@ciac.jl.cn

<sup>b</sup> Graduate School of the Chinese Academy of Sciences, Beijing 100039 (China).

Figure S1 Differential scanning calorimetry (DSC) curve of P(E-co-NB) obtained by **1a**/Al<sup>i</sup>Bu<sub>3</sub>/[Ph<sub>3</sub>C][B(C<sub>6</sub>F<sub>5</sub>)<sub>4</sub>] (entry 1, Table 1)

Figure S2 Differential scanning calorimetry (DSC) curve of P(E-co-NB) obtained by **3a**/Al<sup>i</sup>Bu<sub>3</sub>/[Ph<sub>3</sub>C][B(C<sub>6</sub>F<sub>5</sub>)<sub>4</sub>] (entry 3, Table 1)

Figure S3 Differential scanning calorimetry (DSC) curves of P(E-co-NB)s obtained by **2a**/Al<sup>i</sup>Bu<sub>3</sub>/[Ph<sub>3</sub>C][B(C<sub>6</sub>F<sub>5</sub>)<sub>4</sub>] (entry 2, 5–10, Table 1)

Figure S4 <sup>13</sup>C NMR spectrum of P(E-co-NB) (entry 1, Table 1)

Figure S5 <sup>13</sup>C NMR spectrum of P(E-co-NB) (entry 3, Table 1)

Figure S6 <sup>13</sup>C NMR spectrum of P(E-co-NB) (entry 5, Table 1)

Figure S7 <sup>13</sup>C NMR spectrum of P(E-co-NB) (entry 9, Table 1)

Figure S8 <sup>13</sup>C NMR spectrum of P(E-co-NB) (entry 10, Table 1)

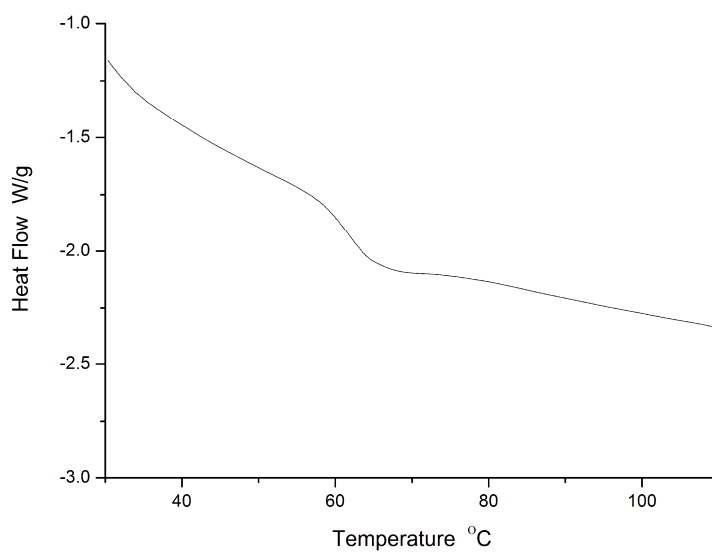

Figure S1 Differential scanning calorimetry (DSC) curve of P(E-co-NB) obtained by **1a**/Al<sup>*i*</sup>Bu<sub>3</sub>/[Ph<sub>3</sub>C][B(C<sub>6</sub>F<sub>5</sub>)<sub>4</sub>] (entry 1, Table 1)

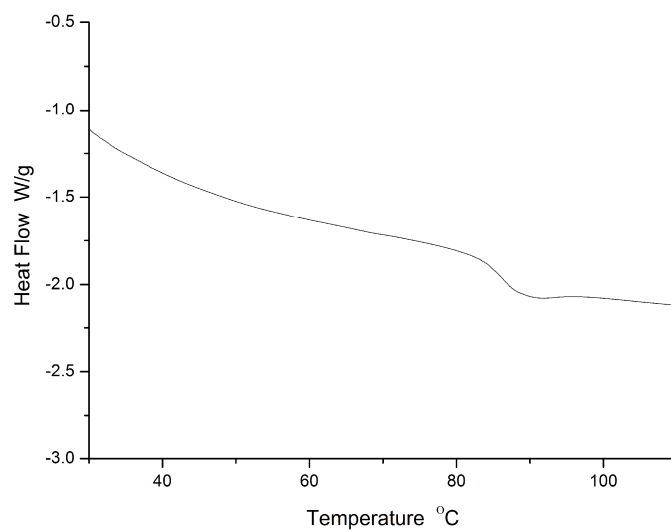

Figure S2 Differential scanning calorimetry (DSC) curve of P(E-co-NB) obtained by **3a**/Al<sup>*i*</sup>Bu<sub>3</sub>/[Ph<sub>3</sub>C][B(C<sub>6</sub>F<sub>5</sub>)<sub>4</sub>] (entry 3, Table 1)

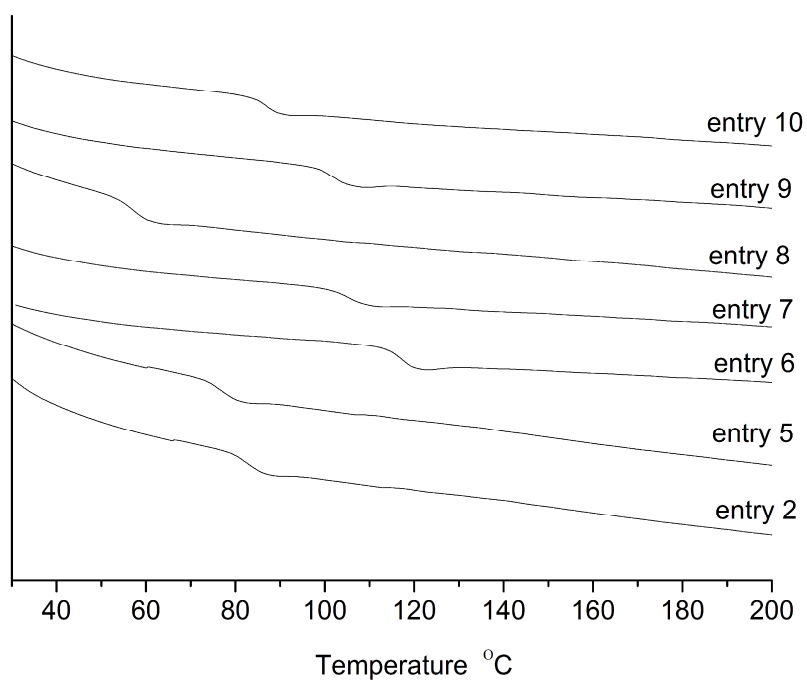

Figure S3 Differential scanning calorimetry (DSC) curves of P(E-co-NB)s obtained by **2a**/Al<sup>i</sup>Bu<sub>3</sub>/[Ph<sub>3</sub>C][B(C<sub>6</sub>F<sub>5</sub>)<sub>4</sub>] (entry 2, 5–10, Table 1)

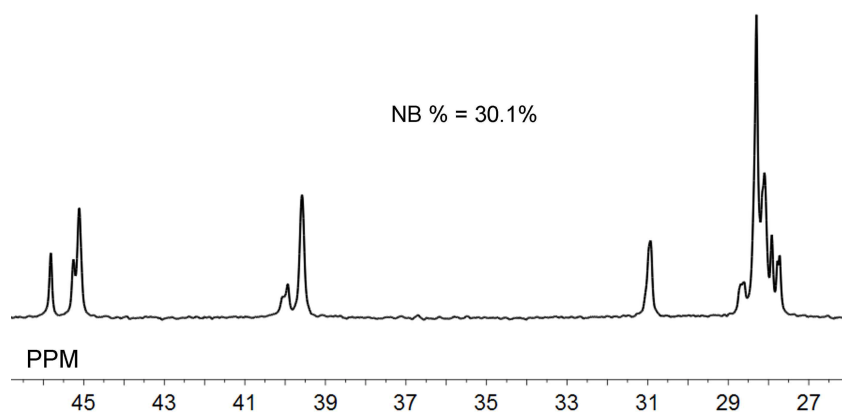

Figure S4 <sup>13</sup>C NMR spectrum of P(E-co-NB) (entry 1, Table 1)

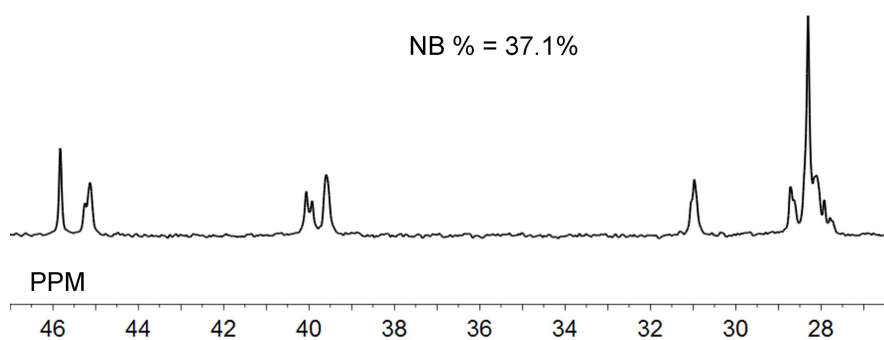

Figure S5  $^{13}\text{C}$  NMR spectrum of P(E-co-NB) (entry 3, Table 1)

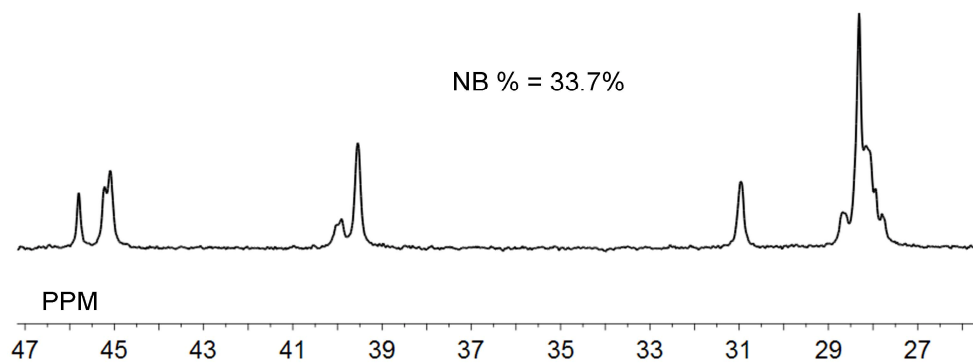

Figure S6  $^{13}\text{C}$  NMR spectrum of P(E-co-NB) (entry 5, Table 1)

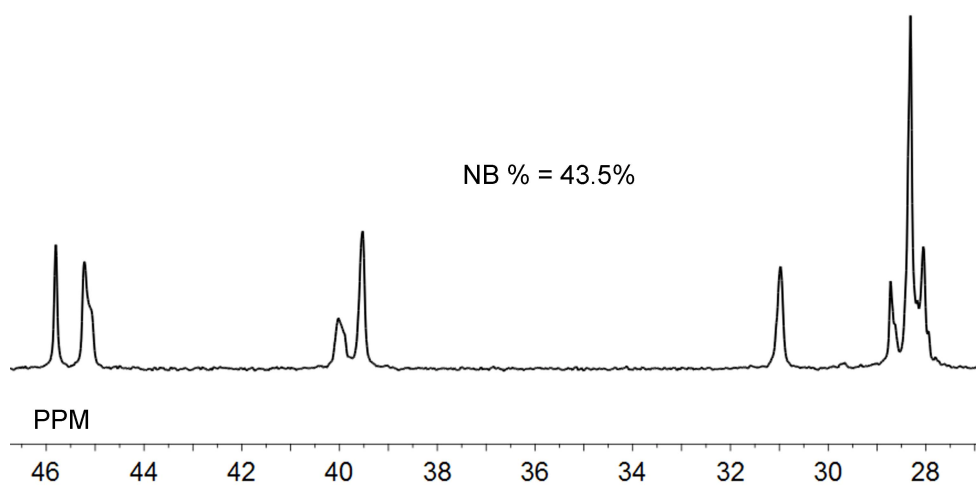

Figure S7  $^{13}\text{C}$  NMR spectrum of P(E-co-NB) (entry 9, Table 1)

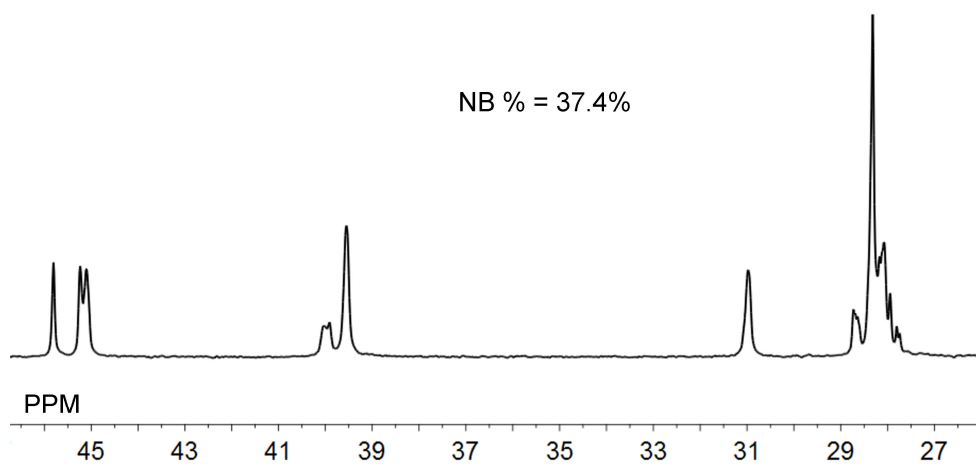

Figure S8  $^{13}\text{C}$  NMR spectrum of P(E-co-NB) (entry 10, Table 1)
